# Supplementary material for: Facile construction of fascinating trimetallic PdAuAg nanocages with exceptional ethylene glycol and glycerol oxidation activity
Source: Royal Society of Chemistry journal article supplement (doi:10.1039/c7nr06737b), 2017-01-01
Supplement: c7nr06737b1.pdf [file c7nr06737b1.pdf]

## Supporting Information for

### Facile construction of fascinating trimetallic PdAuAg nanocages with exceptional ethylene glycol and glycerol oxidation activity

Hui Xu <sup>a</sup>, Jin Wang <sup>a</sup>, Bo Yan <sup>a</sup>, Shumin Li <sup>a</sup>, Caiqin Wang <sup>b</sup>, Yukihide Shiraishi <sup>c</sup>,  
Ping Yang <sup>a</sup> and Yukou Du <sup>\*a</sup>

<sup>a</sup> College of Chemistry, Chemical Engineering and Materials Science, Soochow University,  
Suzhou 215123, PR China

<sup>b</sup> Chemistry Department, University of Toronto, Toronto M5S3H4, RP Canada.

<sup>c</sup> Tokyo University of Science Yamaguchi, Sanyo-Onoda-shi, Yamaguchi 756-0884, Japan

\* Corresponding author: Tel: 86-512-65880089, Fax: 86-512-65880089;

E-mail: duyk@suda.edu.cn (Y. Du).

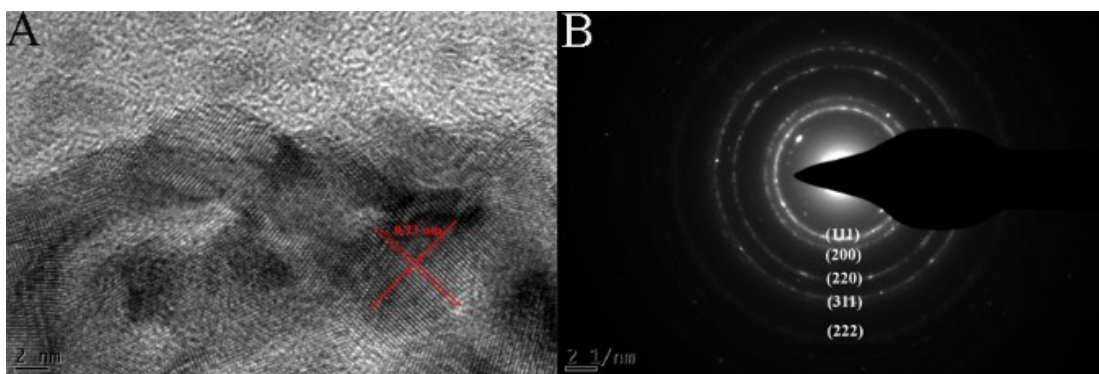

Fig.S1 (A) HR-TEM images of Pd<sub>1</sub>Au<sub>1</sub>Ag<sub>1</sub> and (B) its SAED images.

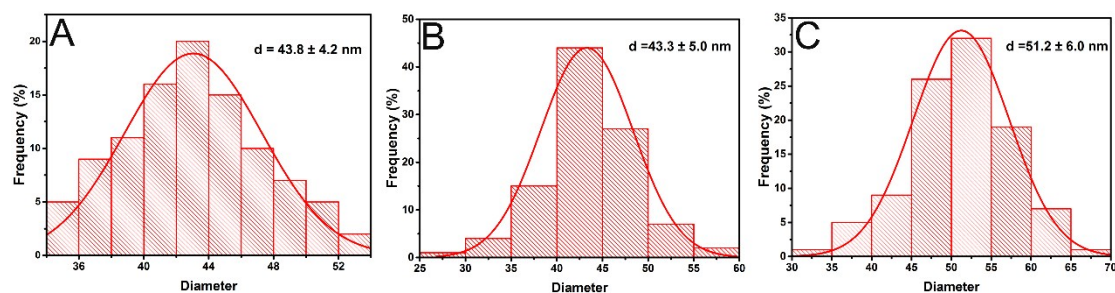

Fig.S2 Diameter distributions of (A) Pd<sub>1</sub>Ag<sub>1</sub>, (B) Pd<sub>1</sub>Au<sub>1</sub>Ag<sub>1</sub> and (C) Au<sub>1</sub>Ag<sub>1</sub> nanocrystals.
